# Supplementary material for: 3D Printed Punctal Plugs for Controlled Ocular Drug Delivery
Source: MDPI journal article supplement (doi:10.3390/pharmaceutics13091421), 2021-09-08
Supplement: s1 [file s1]

## Supplementary Materials: 3D Printed Punctal Plugs for Controlled Ocular Drug Delivery

Xiaoyan Xu, Sahar Awwad, Luis Diaz-Gomez, Carmen Alvarez-Lorenzo, Steve Brocchini, Simon Gaisford, Alvaro Goyanes and Abdul W. Basit

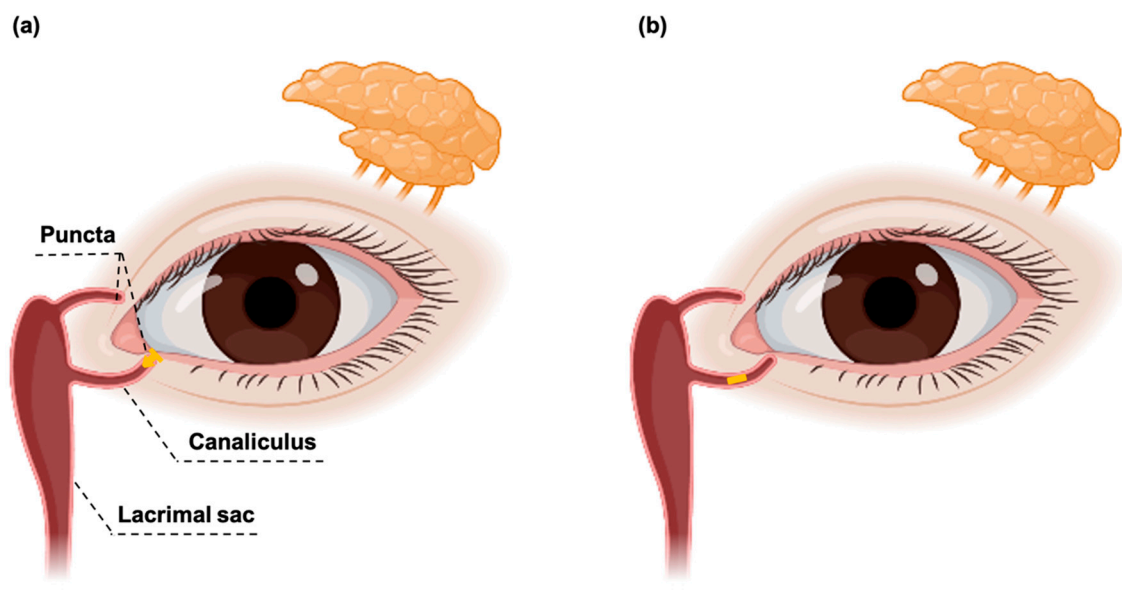

**Figure S1.** Schematic illustration of punctal plug (a) in the punctum and (b) in the canaliculus of the eye.
